# Supplementary material for: Relict Landscape Evolution and Fault Reactivation in the Eastern Tianshan: Insights from the Harlik Mountains
Source: Copernicus journal article supplement (doi:10.5194/egusphere-2024-3668), 2024-12-17
Supplement: Supplementary file 1 [file egusphere-2024-3668-supplement.pdf]

Supplement of

# **Relict Landscape Evolution and Fault Reactivation in the Eastern Tianshan: Insights from the Harlik Mountains**

Zihao Zhao et al.

*Correspondence to:* Tianyi Shen (shenty@cug.edu.cn) and Guocan Wang (wgcan@cug.edu.cn)

The copyright of individual parts of the supplement might differ from the article licence.

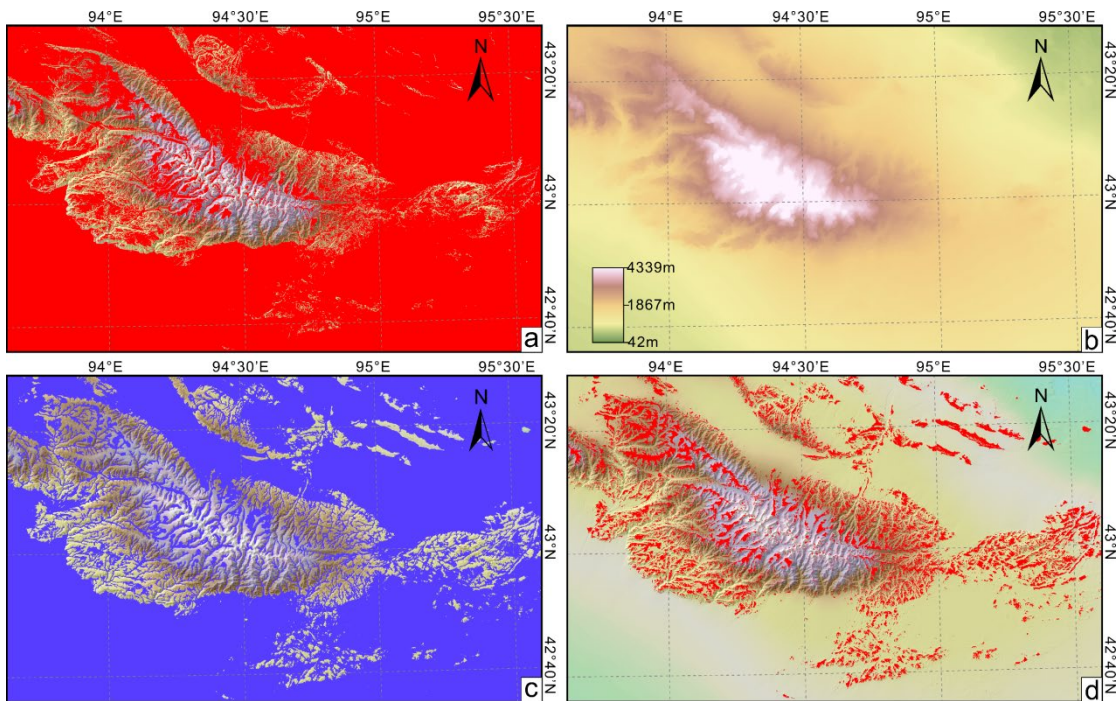

**Figure S1** Extraction of relict surfaces: a. areas in and around the Harlik Mountains with slopes less than  $14^\circ$  (in red); b. the erosional base level resulting from interpolation between rivers (defined using a contributing-area threshold of 100 cells); c. areas in and around the Harlik mountain with a relative height (topography – erosional base level) of less than 40 m (in blue); d. resulting relict surfaces identified within the Harlik Mountains (in red).

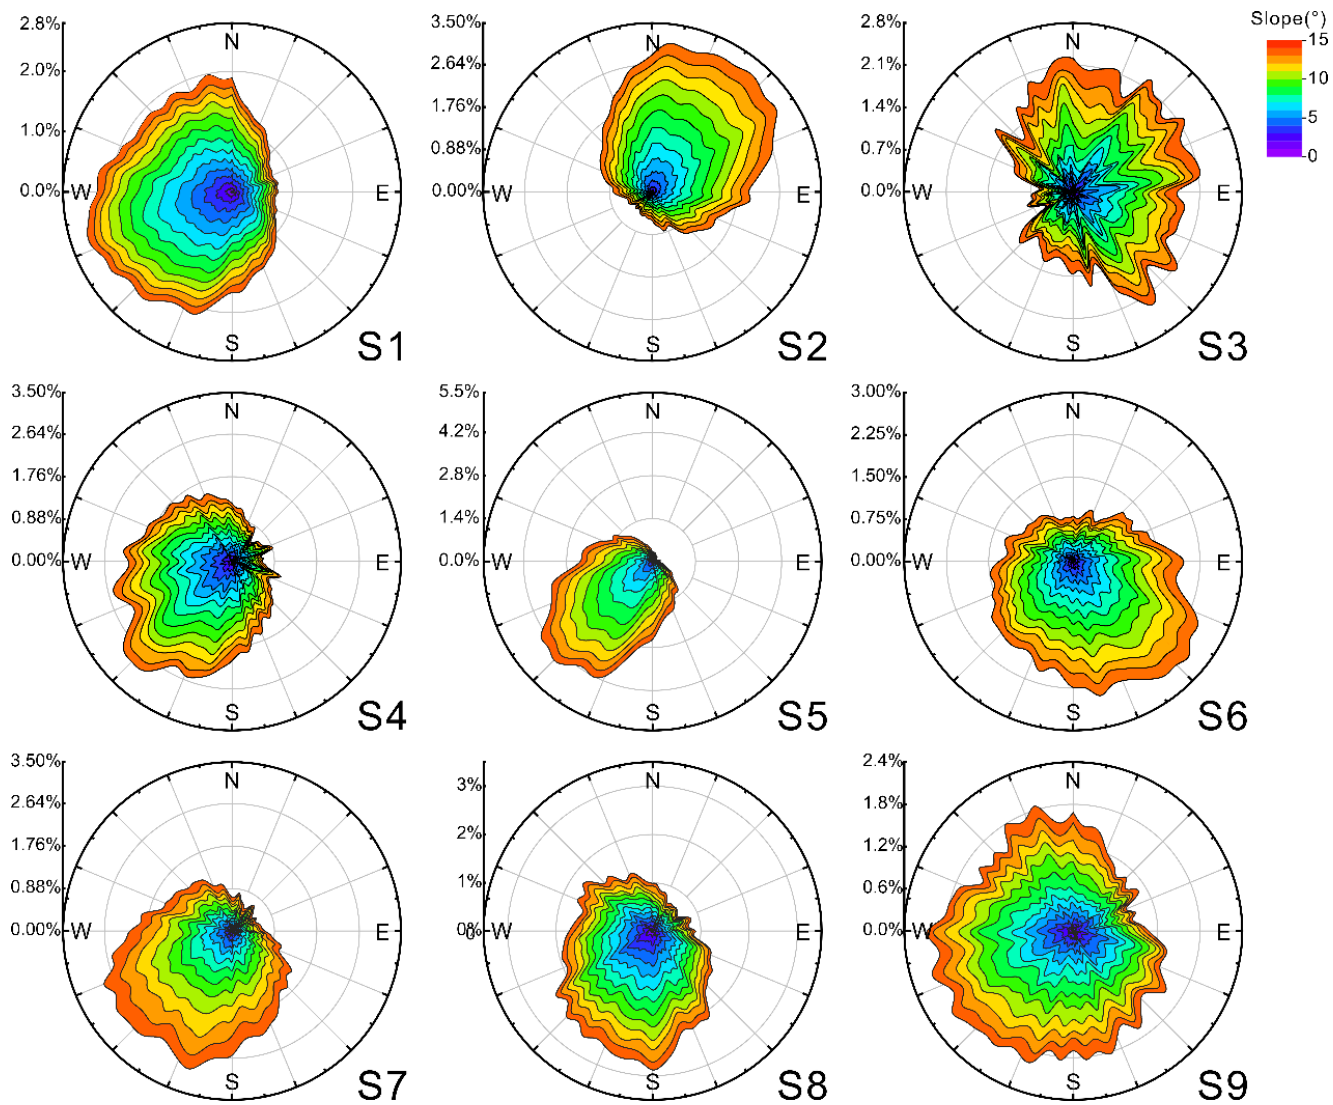

**Figure S2** Slope-aspect rose diagrams of the identified relict surfaces in the Harlik Mountains.

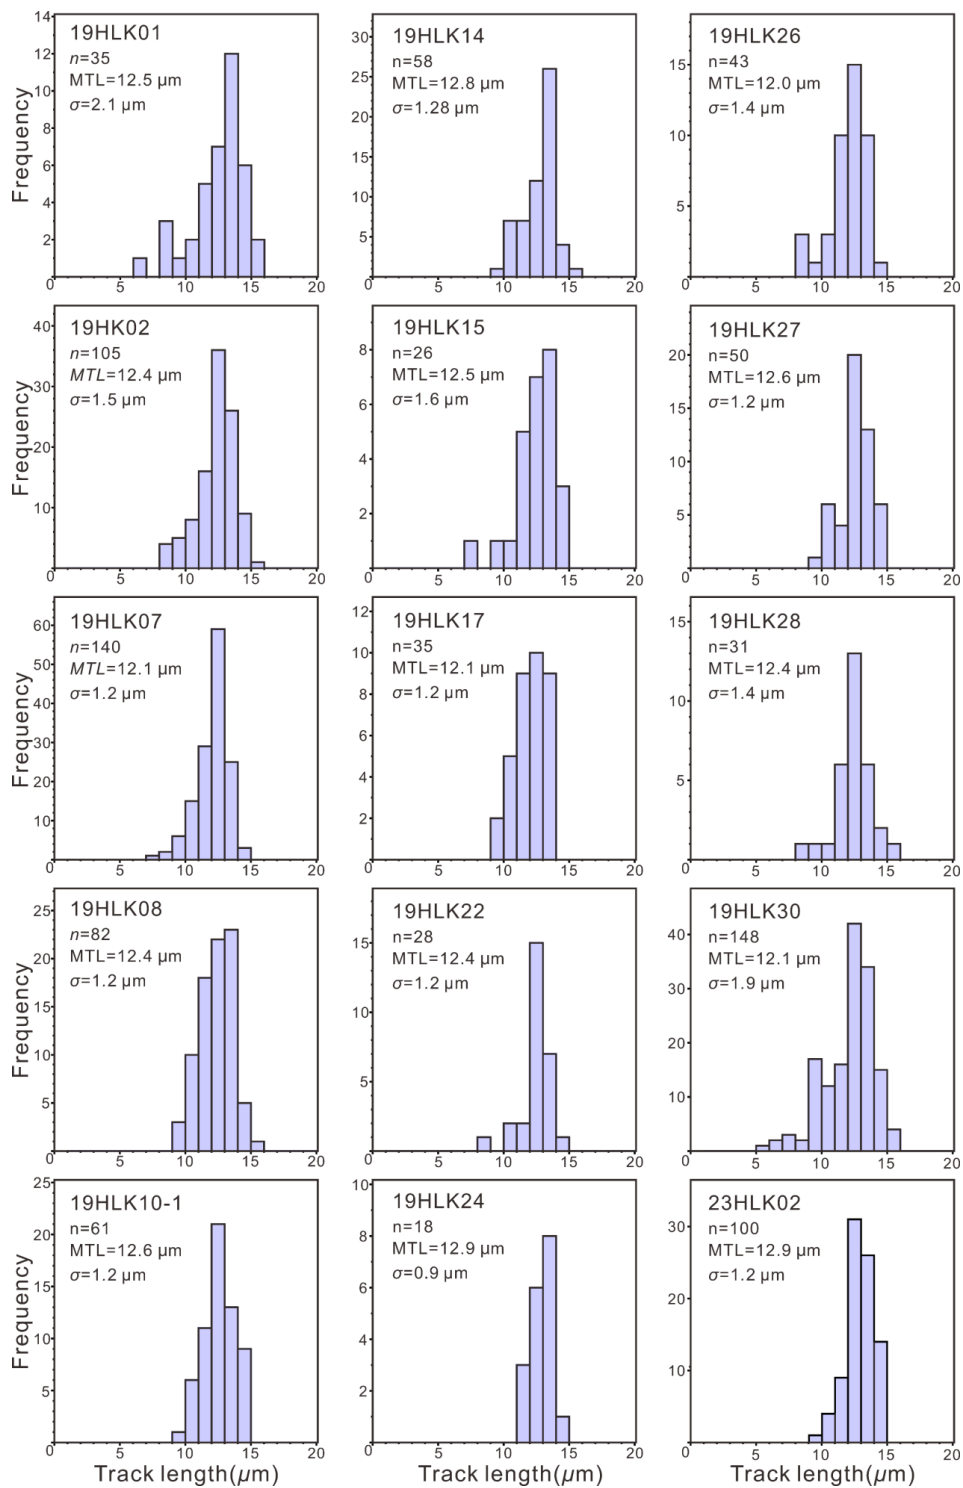

Figure S3 Confined AFT length distributions for each sample.

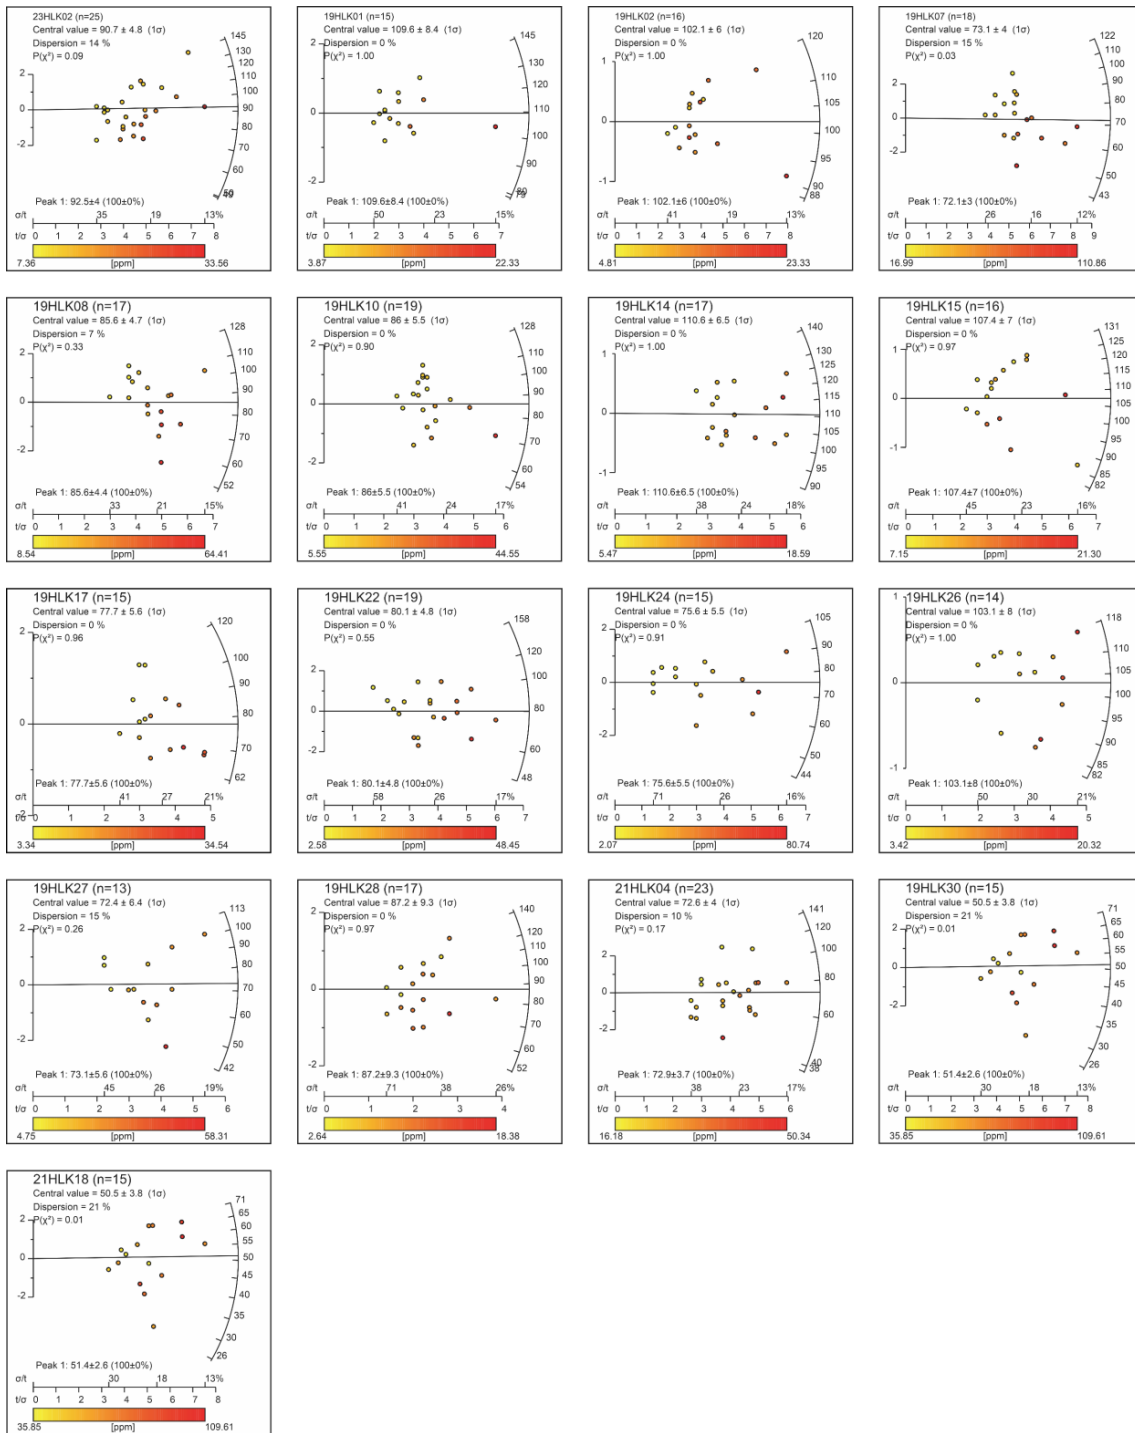

Figure S4 Radial plots of AFT single-grain age data of bedrock samples from the Harlik Mountains.
